# Supplementary material
Source: publisher site journal article supplement (https://www.dovepress.com/article/468215)
Supplement: Supplementary file 1 [file get_supplementary_file.php]

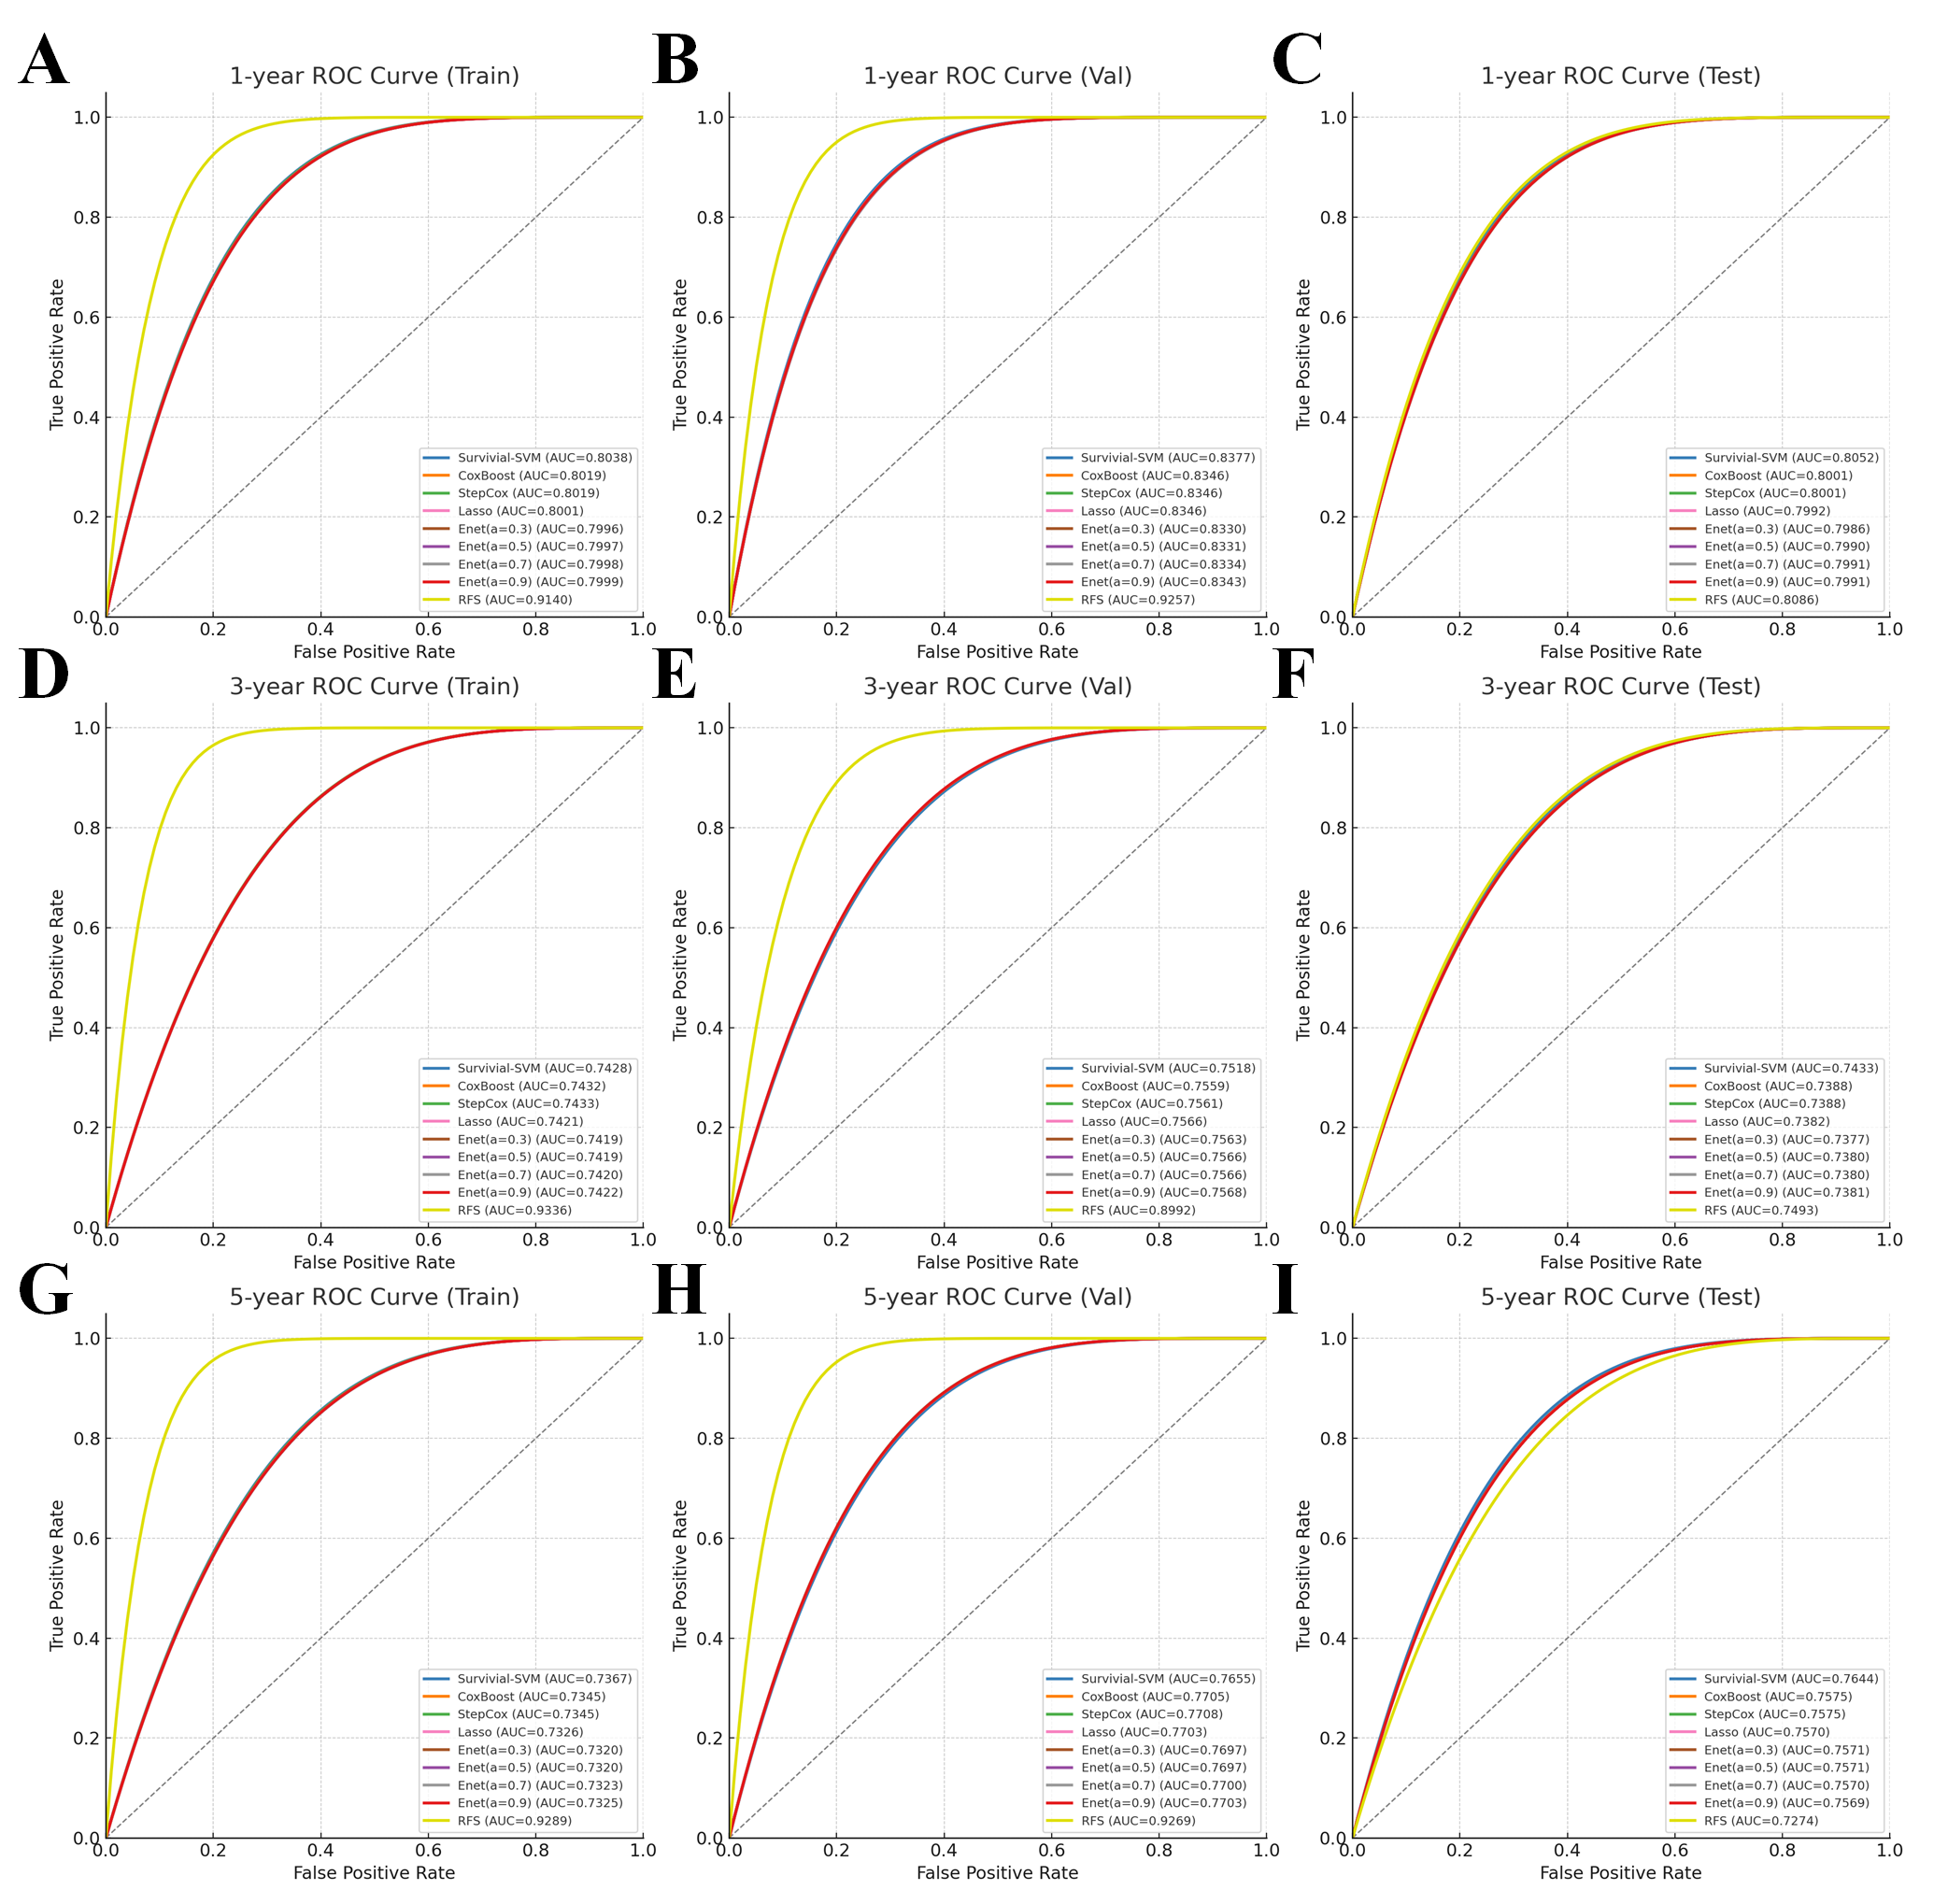


Supplementary figure 1: ROC curves of ML models. (A-C) ROC curves for ML models in 1-year OS in the training (A),validation (B), test (C) dataset. (D-F) ROC curves for ML models in 3-year OS in the training (D),validation (E), test (F) dataset. (G-I) ROC curves for ML models in 5-year OS in the training (G),validation (H), test (I) dataset.

**Supplementary Table 1** Characteristics of HCC patients

| Variables | Low ALI | | High ALI | | *P* value |
| --- | --- | --- | --- | --- | --- |
| (n= 827) | | (n= 827) | |
| Age |  |  |  |  | 0.005 |
| <60 | 326 | (39.42%) | 384 | (46.43%) |  |
| ≥60 | 501 | (60.58%) | 443 | (53.57%) |  |
| Gender |  |  |  |  | 0.886 |
| female | 115 | (13.91%) | 112 | (13.54%) |  |
| male | 712 | (86.09%) | 715 | (86.46%) |  |
| PLT, x103/μL |  |  |  |  | 0.447 |
| <100 | 55 | (6.65%) | 64 | (7.74%) |  |
| ≥100 | 772 | (93.35%) | 763 | (92.26%) |  |
| AFP, ng/ml |  |  |  |  | <0.001 |
| <400 | 461 | (55.74%) | 539 | (65.18%) |  |
| ≥400 | 366 | (44.26%) | 288 | (34.82%) |  |
| Ascites |  |  |  |  | <0.001 |
| Absence | 699 | (84.52%) | 766 | (92.62%) |  |
| Presence | 128 | (15.48%) | 61 | (7.38%) |  |
| BCLC stage |  |  |  |  | <0.001 |
| 0-A | 520 | (62.88%) | 645 | (77.99%) |  |
| B-C | 307 | (37.12%) | 182 | (22.01%) |  |
| Child-pugh |  |  |  |  | <0.001 |
| A | 753 | (91.05%) | 797 | (96.37%) |  |
| B | 74 | (8.95%) | 30 | (3.63%) |  |
| TBIL, μmol/L |  |  |  |  | 0.007 |
| <34 | 791 | (95.65%) | 811 | (98.07%) |  |
| ≥34 | 36 | (4.35%) | 16 | (1.93%) |  |

Supplementary Table 1 (continued)

| Variables | Low ALI | | High ALI | | *P* value |
| --- | --- | --- | --- | --- | --- |
| (n= 827) | | (n= 827) | |
| HBsAg |  |  |  |  | <0.001 |
| Negative | 149 | (18.02%) | 91 | (11%) |  |
| Positive | 678 | (81.98%) | 736 | (89%) |  |
| HBV DNA, IU/ml |  |  |  |  | 0.586 |
| <500 | 376 | (45.47%) | 364 | (44.01%) |  |
| ≥500 | 451 | (54.53%) | 463 | (55.99%) |  |
| IHBD |  |  |  |  | 0.095 |
| No | 565 | (68.32%) | 597 | (72.19%) |  |
| Yes | 262 | (31.68%) | 230 | (27.81%) |  |
| Liver cirrhosis |  |  |  |  | 0.258 |
| No | 418 | (50.54%) | 394 | (47.64%) |  |
| Yes | 409 | (49.46%) | 433 | (52.36%) |  |
| Splenomegaly |  |  |  |  | 0.003 |
| No | 409 | (49.46%) | 471 | (56.95%) |  |
| Yes | 418 | (50.54%) | 356 | (43.05%) |  |
| Alcohol |  |  |  |  | 0.755 |
| No | 543 | (65.66%) | 550 | (66.51%) |  |
| Yes | 284 | (34.34%) | 277 | (33.49%) |  |
| Lymph node metastasis |  |  |  |  | 0.571 |
| No | 763 | (92.26%) | 770 | (93.11%) |  |
| Yes | 64 | (7.74%) | 57 | (6.89%) |  |
| Tumor number |  |  |  |  | 0.064 |
| Solitary | 597 | (72.19%) | 631 | (76.3%) |  |
| Multiple | 230 | (27.81%) | 196 | (23.7%) |  |

Supplementary Table 1 (continued)

| Variables | Low ALI | | High ALI | | *P* value |
| --- | --- | --- | --- | --- | --- |
| (n= 827) | | (n= 827) | |
| MVI |  |  |  |  | 0.001 |
| Absence | 419 | (50.67%) | 490 | (59.25%) |  |
| Presence | 408 | (49.33%) | 337 | (40.75%) |  |
| CK19 |  |  |  |  | 0.148 |
| Negative | 619 | (74.85%) | 645 | (77.99%) |  |
| Positive | 208 | (25.15%) | 182 | (22.01%) |  |
| Edmondson Steiner classification |  |  |  |  | 0.922 |
| I-II | 432 | (52.24%) | 429 | (51.87%) |  |
| III-IV | 395 | (47.76%) | 398 | (48.13%) |  |

**Abbreviations:** PLT, platelet; TBIL, total bilirubin; AFP, alpha-fetoprotein; BCLC, Barcelona Clinic Liver Cancer; IHBD, intrahepatic bile duct dilation; MVI, microvascular invasion; CK19, cytokeratin 19; HBV, Hepatitis B virus.

**Supplementary Table 2** Characteristics of HCC patients in training and validation dataset.

| Variables | Training dataset | | Validation dataset | | *P* value |
| --- | --- | --- | --- | --- | --- |
| n=898 | | n= 384 | |
| ALI |  |  |  |  | 1.000 |
| low | 449 | (50.00%) | 192 | (50.00%) |  |
| high | 449 | (50.00%) | 192 | (50.00%) |  |
| Age |  |  |  |  | 0.275 |
| <60 | 389 | (43.32%) | 153 | (39.84%) |  |
| ≥60 | 509 | (56.68%) | 231 | (60.16%) |  |
| Gender |  |  |  |  | 0.859 |
| female | 129 | (14.37%) | 53 | (13.80%) |  |
| male | 769 | (85.63%) | 331 | (86.20%) |  |
| PLT, x103/μL |  |  |  |  | 0.799 |
| <100 | 58 | (6.46%) | 27 | (7.03%) |  |
| ≥100 | 840 | (93.54%) | 357 | (92.97%) |  |
| AFP, ng/ml |  |  |  |  | 0.957 |
| <400 | 555 | (61.80%) | 236 | (61.46%) |  |
| ≥400 | 343 | (38.20%) | 148 | (38.54%) |  |
| Ascites |  |  |  |  | 0.697 |
| Absence | 817 | (90.98%) | 346 | (90.10%) |  |
| Presence | 81 | (9.02%) | 38 | (9.90%) |  |
| BCLC stage |  |  |  |  | 0.889 |
| 0-A | 645 | (71.83%) | 278 | (72.40%) |  |
| B-C | 253 | (28.17%) | 106 | (27.60%) |  |
| Child-pugh |  |  |  |  | 0.013 |
| A | 867 | (96.55%) | 358 | (93.23%) |  |
| B | 31 | (3.45%) | 26 | (6.77%) |  |

Supplementary Table 2 (continued)

| Variables | Training dataset | | Validation dataset | | *P* value |
| --- | --- | --- | --- | --- | --- |
| n=898 | | n= 384 | |
| TBIL, μmol/L |  |  |  |  | 0.118 |
| <34 | 882 | (98.22%) | 371 | (96.61%) |  |
| ≥34 | 16 | (1.78%) | 13 | (3.39%) |  |
| HBsAg |  |  |  |  | 0.863 |
| Negative | 126 | (14.03%) | 56 | (14.58%) |  |
| Positive | 772 | (85.97%) | 328 | (85.42%) |  |
| HBV DNA，IU/ml |  |  |  |  | 0.126 |
| <500 | 387 | (85.97%) | 184 | (47.92%) |  |
| ≥500 | 511 | (56.90%) | 200 | (52.08%) |  |
| IHBD |  |  |  |  | 0.514 |
| No | 640 | (71.27%) | 266 | (52.08%) |  |
| Yes | 258 | (28.73%) | 118 | (30.73%) |  |
| Liver cirrhosis |  |  |  |  | 0.874 |
| No | 455 | (50.67%) | 192 | (50.00%) |  |
| Yes | 443 | (49.33%) | 192 | (50.00%) |  |
| Splenomegaly |  |  |  |  | 0.147 |
| No | 485 | (54.01%) | 225 | (58.59%) |  |
| Yes | 413 | (45.99%) | 159 | (41.41%) |  |
| Alcohol |  |  |  |  | 0.798 |
| No | 588 | (65.48%) | 255 | (66.41%) |  |
| Yes | 310 | (34.52%) | 129 | (33.59%) |  |
| Lymph node metastasis |  |  |  |  | 0.324 |
| No | 826 | (91.98%) | 360 | (93.75%) |  |
| Yes | 72 | (8.02%) | 24 | (6.25%) |  |

Supplementary Table 2 (continued)

| Variables | Training dataset | | Validation dataset | | *P* value |
| --- | --- | --- | --- | --- | --- |
| n=898 | | n= 384 | |
| Tumor number |  |  |  |  | 0.940 |
| Solitary | 663 | (73.83%) | 285 | (74.22%) |  |
| Multiple | 235 | (26.17%) | 99 | (25.78%) |  |
| MVI |  |  |  |  | 0.947 |
| Absence | 511 | (56.90%) | 220 | (57.29%) |  |
| Presence | 387 | (56.90%) | 164 | (42.71%) |  |
| CK19 |  |  |  |  | 0.927 |
| Negative | 689 | (76.73%) | 293 | (76.30%) |  |
| Positive | 209 | (23.27%) | 91 | (23.70%) |  |
| Edmondson Steiner classification |  |  |  |  | 0.635 |
| I-II | 473 | (52.67%) | 196 | (51.04%) |  |
| III-IV | 425 | (47.33%) | 188 | (48.96%) |  |

**Abbreviations:** PLT, platelet; TBIL, total bilirubin; AFP, alpha-fetoprotein; BCLC, Barcelona Clinic Liver Cancer; IHBD, intrahepatic bile duct dilation; MVI, microvascular invasion; CK19, cytokeratin 19; HBV, Hepatitis B virus.

| Supplementary Table 3 C-index and AUC values in train and validation dataset for ML models | | | | | | | | |
| --- | --- | --- | --- | --- | --- | --- | --- | --- |
| Models | train dataset | | | | validation dataset | | | |
| C-index | AUC values | | | C-index | AUC values | | |
| 1-year | 3-year | 5-year | 1-year | 3-year | 5-year |
| Survivial-SVM | 0.710 | 0.804 | 0.743 | 0.737 | 0.733 | 0.838 | 0.752 | 0.766 |
| CoxBoost | 0.709 | 0.802 | 0.743 | 0.735 | 0.733 | 0.835 | 0.756 | 0.771 |
| StepCox | 0.709 | 0.802 | 0.743 | 0.735 | 0.734 | 0.835 | 0.756 | 0.771 |
| Lasso | 0.708 | 0.800 | 0.742 | 0.733 | 0.733 | 0.835 | 0.757 | 0.770 |
| Enet(a=0.3) | 0.708 | 0.800 | 0.742 | 0.732 | 0.733 | 0.833 | 0.756 | 0.770 |
| Enet(a=0.5) | 0.708 | 0.800 | 0.742 | 0.732 | 0.733 | 0.833 | 0.757 | 0.770 |
| Enet(a=0.7) | 0.708 | 0.800 | 0.742 | 0.732 | 0.733 | 0.833 | 0.757 | 0.770 |
| Enet(a=0.9) | 0.708 | 0.800 | 0.742 | 0.733 | 0.733 | 0.834 | 0.757 | 0.770 |
| RFS | 0.880 | 0.914 | 0.934 | 0.929 | 0.869 | 0.926 | 0.899 | 0.927 |

**Abbreviations:** RFS, random forest survival
